# Supplementary material
Source: PubMed Central journal article supplement (PMC4799766)
Supplement: NIHMS756712-supplement-1.pdf [file NIHMS756712-supplement-1.pdf]

## SUPPLEMENTARY INFORMATION

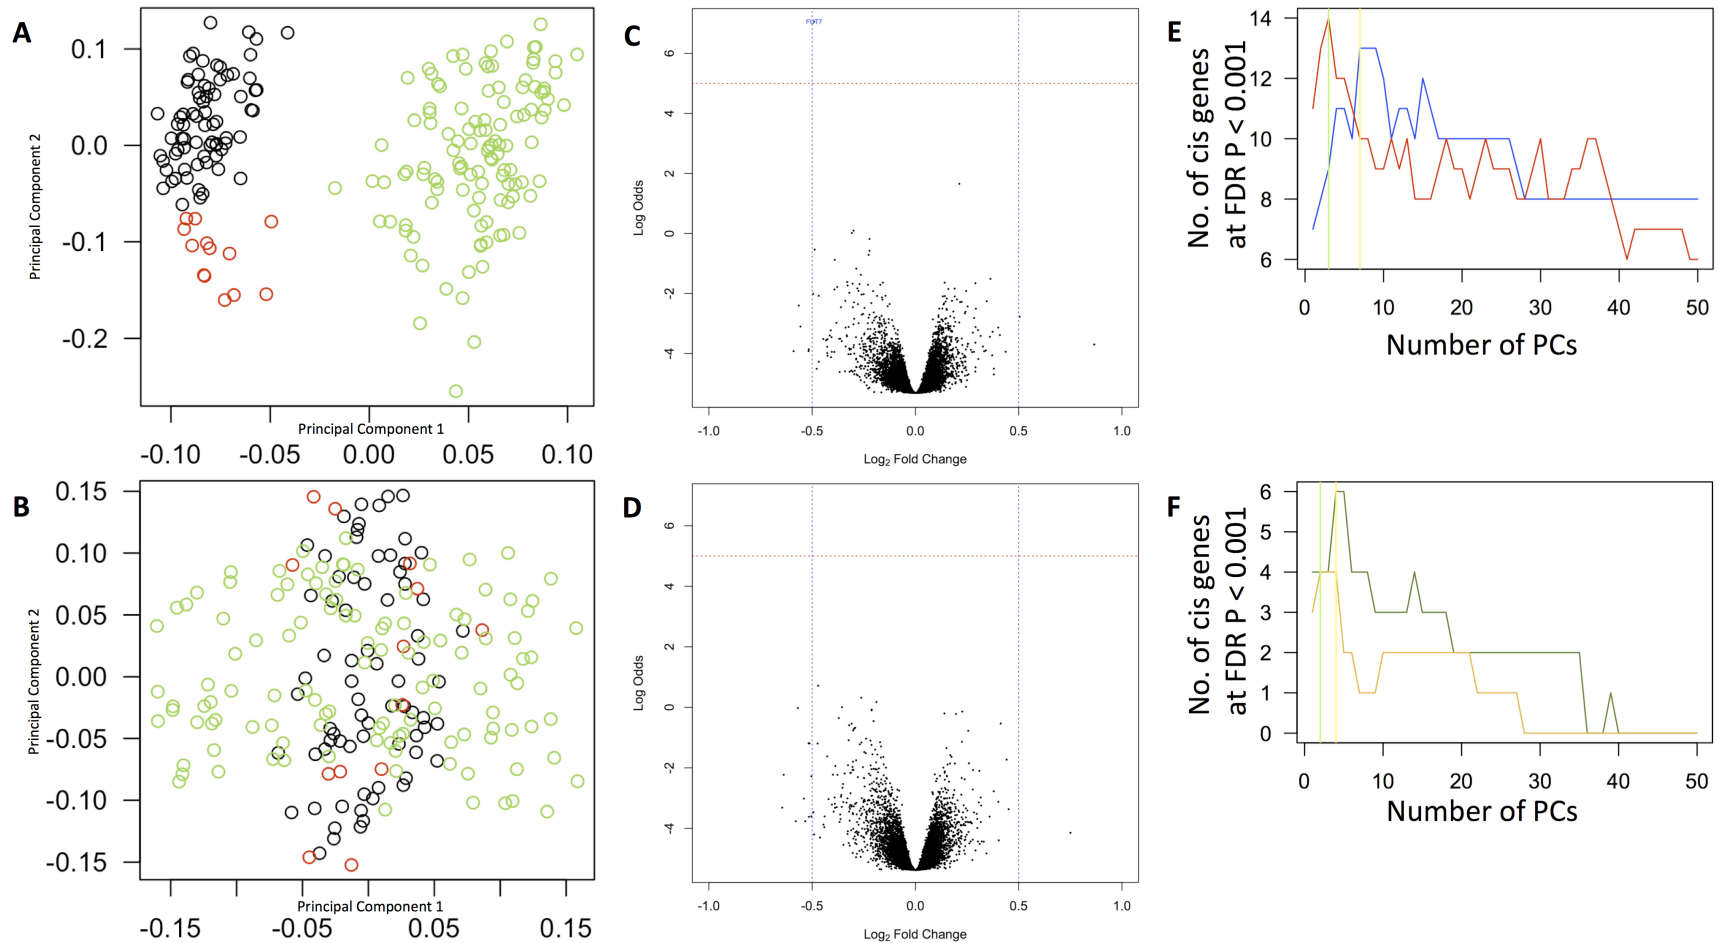

1  
2  
3 **Supplementary Figure 1. Principle component analysis of EBV-B basal cell samples.** Analysis of principle components that define  
4 batch effects: (A) A cross plot between PC1 and PC2 that separate the samples into three technical batches in which samples were  
5 processed (B) A cross plot between PC1 and PC2 after batch effect removal. **Comparison of gene expression in EBV-B cells from**  
6 **cases and controls.** Analysis of differential gene expression in (C) unstimulated and (D) PMA-stimulated B-EBV-B cells from cases  
7 (n=136) and controls (n=25). Differences (log<sub>2</sub> fold change) in gene expression are shown on the X axis; Y axis shows B score (30).  
8 **PCA analysis for detecting eQTLs at FDR P < 0.001.** (E) Blue and red line corresponds to EBV-B basal and PMA stimulated cell  
9 line samples. The x-axis corresponds to number of PCs added as covariates and y-axis corresponds to number of *cis*-genes identified  
10 at FDR P < 0.001 as a result of covariate addition. Threshold lines are drawn at ideal number of PCs as covariate to maximize *cis*-gene  
11 identification. (F) Green and orange lines represent CD4+ and CD8+ cell samples. Analysis is repeated similar to that of EBV-B  
12 samples.

**Supplementary Table I.**

| Cell type         | EBV-B<br>Basal | EBV-B<br>PMA | CD4+  | CD8+  |
|-------------------|----------------|--------------|-------|-------|
| <b>N</b>          | 202            | 202          | 102   | 84    |
| <b>Females</b>    | 48.5%          | 47.5%        | 36.4% | 36.6% |
| <b>Unaffected</b> | 46             | 49           | 6     | 6     |
| <b>Affected</b>   | 156            | 153          | 96    | 78    |
| <b>GAD+</b>       | 63             | 63           | 45    | 34    |
| <b>IA2+</b>       | 95             | 94           | 42    | 36    |
| <b>TPO+</b>       | 60             | 59           | 20    | 15    |
| <b>TG+</b>        | 11             | 10           | 4     | 4     |
| <b>OH21+</b>      | 2              | 2            | 1     | 0     |
| <b>ATPASE+</b>    | 45             | 44           | 10    | 9     |
| <b>Total AB+</b>  | 134            | 131          | 71    | 57    |
| <b>HLA DR34</b>   | 26             | 26           | 30    | 24    |
| <b>HLA DR4X</b>   | 126            | 123          | 42    | 36    |
| <b>HLA DR3X</b>   | 4              | 4            | 15    | 12    |
| <b>HLA DRXX</b>   | 0              | 0            | 5     | 5     |

(i). Summary of Gender, HLA and auto-antibody statuses of samples utilized in this study.

| <b>FDR P</b> |           | <b>EBV-Basal</b> |            | <b>EBV-PMA</b> |            | <b>CD4+</b> |            | <b>CD8+</b> |            |
|--------------|-----------|------------------|------------|----------------|------------|-------------|------------|-------------|------------|
|              |           | <b>RUV</b>       | <b>PCA</b> | <b>RUV</b>     | <b>PCA</b> | <b>RUV</b>  | <b>PCA</b> | <b>RUV</b>  | <b>PCA</b> |
| <i>Cis</i>   | P < 0.001 | 20               | 13         | 17             | 14         | 11          | 6          | 9           | 4          |
|              | P < 0.05  | <b>36</b>        | 28         | <b>37</b>      | 21         | <b>20</b>   | 15         | <b>19</b>   | 8          |
| <i>Trans</i> | P < 0.001 | 29               | 22         | 47             | 22         | 29          | 23         | 30          | 26         |
|              | P < 0.05  | <b>1071</b>      | 57         | <b>1605</b>    | 37         | <b>60</b>   | 25         | <b>66</b>   | 33         |

(ii). Table compares number of cis and trans genes identified by correction methods RUV-2 and PCA at FDR P value thresholds 0.001 and 0.05.

| <b>ID</b> | <b>T1D SNPs</b> | <b>Gene</b>   | <b>Functional variants in LD (<math>r^2 &gt; 0.8</math>)</b> | <b>P- value of T1D SNP</b> | <b>P-value of Func. SNP</b> |
|-----------|-----------------|---------------|--------------------------------------------------------------|----------------------------|-----------------------------|
| 32        | rs10877012      | <i>TSFM</i>   | rs2014886 (splice donor)                                     | 0.44                       | N/A                         |
| 42        | rs4788084       | <i>ATXN2L</i> | rs55719896 (splice acceptor)                                 | 0.0001                     | 2.59x10 <sup>-5</sup>       |
| 45        | rs2290400       | <i>GSDMB</i>  | rs11078928 (splice acceptor)                                 | 0.0017                     | 0.0006                      |
| 51        | rs679574        | <i>FUT2</i>   | rs601338 (stop gain)                                         | 3.59x10 <sup>-6</sup>      | N/A                         |

(iii). Splice-region and stop-gain variant SNPs found in LD ( $r^2 > 0.8$ ) with 4 T1D loci. T1D loci identifiers as in Table I. N/A – SNP genotypes not available

**Supplementary Table II.**

| ID | TID SNP (Effect allele) | Gene            | EBV-B basal | EBV-B PMA | CD4+ | CD8+ |
|----|-------------------------|-----------------|-------------|-----------|------|------|
| 1  | rs2269241 (C)           | <i>PGM1</i>     | ns          | ↓*        | ns   | ns   |
| 6  | rs2165738 (C)           | <i>SF3B14</i>   | ↓*          | ns        | ns   | ns   |
| 7  | rs363609 (C)            | <i>NCOA1</i>    | ns          | ↑*        | ns   | ns   |
| 7  | rs363609 (C)            | <i>AUPI</i>     | ↑*          | ns        | ns   | ns   |
| 8  | rs9653442 (C)           | <i>CHST10</i>   | ns          | ↓**       | ns   | ns   |
| 9  | rs6543134 (C)           | <i>IL18RAP</i>  | ns          | ns        | ns   | ↑**  |
| 11 | rs231727 (T)            | <i>CTLA4</i>    | ns          | ns        | ns   | ↓*   |
| 17 | rs597325 (C)            | <i>ANKRD6</i>   | ns          | ↓*        | ns   | ns   |
| 19 | rs2327832 (C)           | <i>HEBP2</i>    | ↓*          | ns        | ns   | ns   |
| 20 | rs1738074 (C)           | <i>TCPI</i>     | ns          | ns        | ↓*   | ns   |
| 23 | rs7020673 (C)           | <i>GLIS3</i>    | ns          | ↓*        | ns   | ns   |
| 23 | rs10758593 (T)          | <i>PPAPDC2</i>  | ns          | ns        | ↓*   | ns   |
| 25 | rs947474 (C)            | <i>PFKFB3</i>   | ↑**         | ↑*        | ns   | ns   |
| 26 | rs722988 (C)            | <i>ITGB1</i>    | ns          | ns        | ns   | ↑**  |
| 27 | rs10509540 (T)          | <i>PTEEN</i>    | ns          | ns        | ns   | ↓**  |
| 27 | rs3764021 (T)           | <i>CLEC2B</i>   | ↑**         | ns        | ns   | ns   |
| 29 | rs10466829 (T)          | <i>CD69</i>     | ↑**         | ns        | ns   | ns   |
|    |                         | <i>DDX12</i>    | ↓*          | ns        | ns   | ns   |
| 30 | rs705704 (T)            | <i>CLEC1A</i>   | ns          | ns        | ↓*   | ns   |
|    |                         | <i>PA2G4</i>    | ↑*          | ns        | ns   | ns   |
|    |                         | <i>STAT2</i>    | ↓*          | ↓**       | ns   | ns   |
| 30 | rs2292239 (T)           | <i>ESYT1</i>    | ns          | ↓*        | ns   | ns   |
|    |                         | <i>ATP5B</i>    | ↓*          | ns        | ns   | ns   |
| 32 | rs10877012 (C)          | <i>BLOC1S1</i>  | ns          | ns        | ↓**  | ns   |
|    |                         | <i>TSPAN31</i>  | ns          | ns        | ↑**  | ↑**  |
| 33 | rs1265565 (T)           | <i>SLC26A10</i> | ns          | ns        | ns   | ↑*   |
|    |                         | <i>HVCN1</i>    | ns          | ↑*        | ns   | ns   |
| 34 | rs17696736 (C)          | <i>TMEM116</i>  | ns          | ↓*        | ns   | ns   |
|    |                         | <i>OAS2</i>     | ↑**         | ns        | ns   | ns   |
|    |                         | <i>SH2B3</i>    | ns          | ↑**       | ns   | ns   |
| 42 | rs4788084 (C)           | <i>CL2ORF30</i> | ns          | ns        | ns   | ↓*   |
|    |                         | <i>IL27</i>     | ns          | ↓*        | ns   | ns   |
| 45 | rs2290400 (T)           | <i>CCR7</i>     | ns          | ↑*        | ns   | ns   |
| 46 | rs7221109 (C)           | <i>MED24</i>    | ↑*          | ns        | ns   | ns   |
|    |                         | <i>KRT9</i>     | ↑*          | ns        | ns   | ns   |
| 47 | rs1893217 (C)           | <i>PTPN2</i>    | ↓*          | ns        | ns   | ns   |
| 49 | rs2304256 (C)           | <i>PDE4A</i>    | ns          | ↓*        | ns   | ns   |
| 51 | rs679574 (C)            | <i>CD37</i>     | ns          | ns        | ns   | ↓*   |
| 53 | rs11203203 (T)          | <i>WDR4</i>     | ns          | ↓*        | ns   | ns   |
|    |                         | <i>UCRC</i>     | ↓**         | ↓*        | ns   | ns   |
| 54 | rs5753037 (T)           | <i>EWSR1</i>    | ↓*          | ns        | ns   | ns   |
|    |                         | <i>NIPSNAP1</i> | ns          | ↑*        | ns   | ns   |
| 55 | rs229541 (T)            | <i>APOL2</i>    | ↑*          | ns        | ns   | ns   |
| 58 | rs2611215 (A)           | <i>TMEM192</i>  | ↓**         | ns        | ns   | ns   |

(i) List of *cis* gene interaction detected at below FDR  $P < 0.05$ . \*\*  $P < 0.01$ , \*  $P < 0.05$ , ns – not significant, ↓ risk allele decreases expression, ↑ risk allele increases expression

| CHR      | TID SNP    | <i>Trans</i> genes identified at FDR $P < 0.01$                                                                                    |
|----------|------------|------------------------------------------------------------------------------------------------------------------------------------|
| 1p31.3   | rs2269241  | <i>C4orf34, OPTN, RPL34, TP53TG1, WDR33, ZNF786</i>                                                                                |
| 1q31.2   | rs2816316  | <i>FGR</i>                                                                                                                         |
| 2p24.3   | rs1534422  | <i>C1orf226, PLAC1, RHOBTB2, ST6GAL1</i>                                                                                           |
| 2p23.3   | rs2165738  | <i>AASDH, CCDC106, GABPB2, SLC2A5</i>                                                                                              |
| 2p13.1   | rs363609   | <i>EIF2B2, LOC645018, TLR10</i>                                                                                                    |
| 2q11.2   | rs9653442  | <i>SCAPER</i>                                                                                                                      |
| 2q12.1   | rs6543134  | <i>ADK, FANCE, FXR2, LOC728532, MAPK13, PRRT3, TNFRSF8</i>                                                                         |
| 2q24.2   | rs1990760  | <i>JUND, LOC392285, LOC643997, LOC649946, OMA1, REL</i>                                                                            |
| 2q24.2   | rs3747517  | <i>LOC649946, UFM1</i>                                                                                                             |
| 2q33.2   | rs11571291 | <i>CCDC86, LOC729148, RYK, ST6GALNAC4, TDPI, TJAPI, TMUB2, ZNF549</i>                                                              |
| 2q33.2   | rs3087243  | <i>LOC729148, SENP6, TDPI, TMUB2, ZNF549</i>                                                                                       |
| 2q33.2   | rs231727   | <i>BIRC2, FADS2, MOBKL2A, TDP1, ZNF549, ZNF69</i>                                                                                  |
| 2q35     | rs3731865  | <i>C1orf106, CENPM, DYNC1H1, FEZ1, ID3, JAM2, NOTCH1, SLAMF6</i>                                                                   |
| 3p21.31  | rs11711054 | <i>C11orf73, G3BP1, GRAMD1B, NME4, SLC35B2</i>                                                                                     |
| 4p15.2   | rs10517086 | <i>HMGB1L1</i>                                                                                                                     |
| 4q27     | rs4505848  | <i>ATG9A, CDC2L5, NT5DC3, PDCD10, SIX3</i>                                                                                         |
| 4q27     | rs17388568 | <i>SIX3</i>                                                                                                                        |
| 4q27     | rs2069763  | <i>ATG9A, CDC2L5, PDCD10, SIX3</i>                                                                                                 |
| 5p13.2   | rs6897932  | <i>ARHGAP17, BCL7C, CDC42EP5, GLDC, KLF10, MNX1</i>                                                                                |
| 6q15     | rs597325   | <i>NT5E, TBC1D9, TNK1</i>                                                                                                          |
| 6q15     | rs56297233 | <i>DBI, EDEMI, LRP5L, NR2F2</i>                                                                                                    |
| 6q22.32  | rs9388489  | <i>C18orf56</i>                                                                                                                    |
| 6q23.3   | rs2327832  | <i>CHD2, PCCA</i>                                                                                                                  |
| 6q23.3   | rs10499194 | <i>EHD1, LOC728661, TUBB6</i>                                                                                                      |
| 6q25.3   | rs1738074  | <i>EXOSC7, LOC388436</i>                                                                                                           |
| 7p15.2   | rs7804356  | <i>GPM6A, LHX3, NCAPD2, NME7, POLA2, RRP15, SAR1B, SEC61G, SERPIN A9, SLC39A8, SPAG1, TYMS</i>                                     |
| 7p12.2   | rs10272724 | <i>HESI, SGCE, SMAP1</i>                                                                                                           |
| 9p24.2   | rs7020673  | <i>FHL3, LOC646939, PLCB2</i>                                                                                                      |
| 9p24.2   | rs10758593 | <i>PICALM, ZNF695</i>                                                                                                              |
| 10p15.1  | rs12251307 | <i>C14orf68, CAMK2D, DERA, SASS6, ZNF326</i>                                                                                       |
| 10p15.1  | rs947474   | <i>GLB1, MEIS2, NOL12, PTP4A3</i>                                                                                                  |
| 11p15.5  | rs7928968  | <i>TLCD1</i>                                                                                                                       |
| 11p15.5  | rs3842727  | <i>CD276, ID2, LOC347292, NLRP2, TRIP6</i>                                                                                         |
| 11p15.5  | rs7111341  | <i>FCGR2A, G3BP1, TUBB4Q</i>                                                                                                       |
| 12p13.31 | rs3764021  | <i>SNORA24, SPDYA, SYNE2</i>                                                                                                       |
| 12p13.31 | rs10466829 | <i>COCH, NFATC1, SNORA24, SPDYA, SYNE2</i>                                                                                         |
| 12q13.2  | rs705704   | <i>HES4, IP6K2, LOC100129552, LOC389386, LOC641768, LOC728823, LOC728873, LOC92659, MIR130A, MIR1471, RPS26P10, RPS26P11, RTTN</i> |

(ii) List of all *trans* gene interaction detected at below FDR  $P < 0.01$  in cells tested.

... cont

| CHR      | TID SNP    | <i>Trans</i> genes identified at FDR $P < 0.01$                                                                                     |
|----------|------------|-------------------------------------------------------------------------------------------------------------------------------------|
| 12q13.2  | rs11171739 | <i>IP6K2, LOC100129552, LOC389386, LOC641768, LOC728823, LOC728873, LOC92659, MIR130A, MIR1471, OASL, RPS26P10, RPS26P11</i>        |
| 12q13.2  | rs2292239  | <i>DDIT4, IP6K2, LOC100129552, LOC389386, LOC641768, LOC728823, LOC728873, LOC92659, MIR130A, MIR1471, NRP2, RPS26P10, RPS26P11</i> |
| 12q13.3  | rs3809114  | <i>BEX5, LITAF, SLC9A3R1, SNRNP25</i>                                                                                               |
| 12q14.1  | rs10877012 | <i>ECGF1</i>                                                                                                                        |
| 12q24.12 | rs1265565  | <i>DCUN1D5, NCOA7, ZMYM5</i>                                                                                                        |
| 12q24.12 | rs3184504  | <i>EIF2AK2, NCOA7, TBX15, TPCN2, UBE2L6</i>                                                                                         |
| 12q24.13 | rs17696736 | <i>IFI16, IRF8, MIA3, NCOA7, SPI10, TBX15</i>                                                                                       |
| 13q32.3  | rs9585056  | <i>AHCTF1, CKS2, IFIH1, MARCKS, MRPL35</i>                                                                                          |
| 14q24.1  | rs1465788  | <i>CCDC50, DLGAP4, LHFP, SRM</i>                                                                                                    |
| 14q32.2  | rs4900384  | <i>EIF5B, PLP2, RASSF6, RBMS1, SSPN</i>                                                                                             |
| 14q32.2  | rs56994090 | <i>BATF, TXNRD2</i>                                                                                                                 |
| 15q14    | rs17574546 | <i>FBXO48, HES4, LUZP1, NAT9, NSBP1</i>                                                                                             |
| 15q14    | rs12908309 | <i>BCL2L1, CD99, ELL3, FAHD1, HMHB1, JAM2, RNF13, STAT5A, TMC01, ZMAT5</i>                                                          |
| 15q25.1  | rs3825932  | <i>ASNS, CLDN12, MORF4L2, PCK2, SLC1A5, TRIT1, UBXN2A</i>                                                                           |
| 16p13.13 | rs12708716 | <i>CSTF3, LOC642828, SAFB, SNRNP25</i>                                                                                              |
| 16p13.13 | rs12927355 | <i>CSTF3, LARP7, LOC642828, SMOX, SNRNP25, TAF1D, VAMP4</i>                                                                         |
| 16p13.13 | rs416603   | <i>BHLHB2, CD86, DAP, IL10RA, OXTR, SORL1</i>                                                                                       |
| 16p11.2  | rs4788084  | <i>PRKDC</i>                                                                                                                        |
| 16p11.2  | rs9924471  | <i>DUSP5, LOC440926, LRRC33, PHC2, RRP7A, ZNF681</i>                                                                                |
| 16q23.1  | rs7202877  | <i>FAM71F2, LOC100134708</i>                                                                                                        |
| 16q23.1  | rs8056814  | <i>HS.467627</i>                                                                                                                    |
| 17p13.1  | rs16956936 | <i>HLA-DRB4</i>                                                                                                                     |
| 17q12    | rs2290400  | <i>TEX9</i>                                                                                                                         |
| 17q21.2  | rs7221109  | <i>SMAD7, USP14</i>                                                                                                                 |
| 18p11.21 | rs1893217  | <i>CDC2L5, KDM3B, MCM3AP, PDGFA</i>                                                                                                 |
| 18q22.2  | rs763361   | <i>ATM, IL16, P2RY11, RIOK1, TADA2A</i>                                                                                             |
| 19p13.2  | rs2304256  | <i>CAMKK2, USP24, ZNF280D</i>                                                                                                       |
| 19q13.32 | rs425105   | <i>ACP5, C6orf72, CCL5, CYBRD1, GAPDHL6, LRIG1, PIK3R6, PSMC4, PTK7, SALL2, SLAIN1</i>                                              |
| 19q13.33 | rs679574   | <i>EIF5A, HLA-DRB4, HLA-H, SLFN11, TMEM55A, ZC3HC1</i>                                                                              |
| 20p13    | rs2281808  | <i>BRD3, DDX41, MAPKAPK3, MED4, SLFN11, WTAP</i>                                                                                    |
| 21q22.3  | rs11203203 | <i>PRKAR1B</i>                                                                                                                      |
| 21q22.3  | rs876498   | <i>CAT, CYBRD1, PRKAR1B</i>                                                                                                         |
| 22q12.2  | rs5753037  | <i>ABCA6, ANXA6, CCDC53, SLC35B2</i>                                                                                                |
| 22q12.3  | rs229541   | <i>BIRC3, SV2B</i>                                                                                                                  |

(ii) List of all *trans* gene interaction detected at below FDR  $P < 0.01$  in cells tested.

# Supplementary Table III.

| TID Locus | TID SNP   | Trans Genes identified at FDR P between 0.01 - 0.05                                                                                                                                                                                                                                                                                                                                                                                                                                                                                  | TID Locus | TID SNP    | Trans Genes identified at FDR P between 0.01 - 0.05                                                                                                                                                                                                                                                                                                                                                                                                                                                                                  | TID Locus | TID SNP    | Trans Genes identified at FDR P between 0.01 - 0.05                                                                                                                                                                                                                                                                                                                                                                                                                                                                                  | TID Locus | TID SNP    | Trans Genes identified at FDR P between 0.01 - 0.05                                                                                                                                                                                                                                                                                                                                                                                                                                                                                                                                                                                                                                                                                                                                                                                                                                                                                                                                                                                                                                                                                                                                                                                                                                                                                                                                                                                                                                                                                                                                                                                                                                                                                                                                                                                                                                                                                                                                                                                                                                                                                                                                                                                                                                                                                                                                                                                                                                                                                                                                                                                                                                                                                                                                                                                                                                                                                                                                                                                                                                                                                                                                                                                                                                                                                                                                                                                                                                                                                                                                                                                                                                                                                                                                                                                                                                                                                                                                                                                                                                                                                                                                                                                                                                                                                                                                                                                                                                                                                                                                                                                                                                                                                                                                                                                                                                                                                                                                                                                                                                                                                              |        |           |                                                                                                                                                                     |        |            |                    |         |            |                                                                                                                                                            |        |           |                                                                                                                                                       |        |           |                                                                                                                                                                     |        |            |                    |         |            |                                                                                                                                                            |
|-----------|-----------|--------------------------------------------------------------------------------------------------------------------------------------------------------------------------------------------------------------------------------------------------------------------------------------------------------------------------------------------------------------------------------------------------------------------------------------------------------------------------------------------------------------------------------------|-----------|------------|--------------------------------------------------------------------------------------------------------------------------------------------------------------------------------------------------------------------------------------------------------------------------------------------------------------------------------------------------------------------------------------------------------------------------------------------------------------------------------------------------------------------------------------|-----------|------------|--------------------------------------------------------------------------------------------------------------------------------------------------------------------------------------------------------------------------------------------------------------------------------------------------------------------------------------------------------------------------------------------------------------------------------------------------------------------------------------------------------------------------------------|-----------|------------|--------------------------------------------------------------------------------------------------------------------------------------------------------------------------------------------------------------------------------------------------------------------------------------------------------------------------------------------------------------------------------------------------------------------------------------------------------------------------------------------------------------------------------------------------------------------------------------------------------------------------------------------------------------------------------------------------------------------------------------------------------------------------------------------------------------------------------------------------------------------------------------------------------------------------------------------------------------------------------------------------------------------------------------------------------------------------------------------------------------------------------------------------------------------------------------------------------------------------------------------------------------------------------------------------------------------------------------------------------------------------------------------------------------------------------------------------------------------------------------------------------------------------------------------------------------------------------------------------------------------------------------------------------------------------------------------------------------------------------------------------------------------------------------------------------------------------------------------------------------------------------------------------------------------------------------------------------------------------------------------------------------------------------------------------------------------------------------------------------------------------------------------------------------------------------------------------------------------------------------------------------------------------------------------------------------------------------------------------------------------------------------------------------------------------------------------------------------------------------------------------------------------------------------------------------------------------------------------------------------------------------------------------------------------------------------------------------------------------------------------------------------------------------------------------------------------------------------------------------------------------------------------------------------------------------------------------------------------------------------------------------------------------------------------------------------------------------------------------------------------------------------------------------------------------------------------------------------------------------------------------------------------------------------------------------------------------------------------------------------------------------------------------------------------------------------------------------------------------------------------------------------------------------------------------------------------------------------------------------------------------------------------------------------------------------------------------------------------------------------------------------------------------------------------------------------------------------------------------------------------------------------------------------------------------------------------------------------------------------------------------------------------------------------------------------------------------------------------------------------------------------------------------------------------------------------------------------------------------------------------------------------------------------------------------------------------------------------------------------------------------------------------------------------------------------------------------------------------------------------------------------------------------------------------------------------------------------------------------------------------------------------------------------------------------------------------------------------------------------------------------------------------------------------------------------------------------------------------------------------------------------------------------------------------------------------------------------------------------------------------------------------------------------------------------------------------------------------------------------------------------------------------------|--------|-----------|---------------------------------------------------------------------------------------------------------------------------------------------------------------------|--------|------------|--------------------|---------|------------|------------------------------------------------------------------------------------------------------------------------------------------------------------|--------|-----------|-------------------------------------------------------------------------------------------------------------------------------------------------------|--------|-----------|---------------------------------------------------------------------------------------------------------------------------------------------------------------------|--------|------------|--------------------|---------|------------|------------------------------------------------------------------------------------------------------------------------------------------------------------|
| 1p31.3    | rs2269241 | ACER1, BCAT1, BCL11A, BSDC1, C17orf97, C1orf94, CCL5, CD1D, DCN2, DEFB3, DNAJB11, EIF1B, ELFP3, GDI1, GINS3, JHDM1D, KCRD, LOC281908, LOC401321, LOC653748, LRRM1, LZYL1, METTL3, MTR, NELL2, PHF, PLOD3, POLR3B, PRL23, RPL36, RPL6, SEC13, SNRPB, SNX1, TROK2, TRAP1, WDR41, WDR1, WRB, CXCR7, DNAJB9, DNMT3B, DTD1, ERF1, FKBP9, HLA-H, HLA-I, KDELR3, LOC402057, LOC730074, PRRG4, RAB4B, RPL2L21, TAP2, TP53INP1, TTC5                                                                                                          | 2q33.2    | rs11571291 | ACTN1, AEB, ALG13, AUH, BAG3, BCL2, BRMS1L, BSG, BTBD12, C11orf67, C11orf68, CDKN1A, CHIL1, CIAPIN1, CNP2, CPSP1, CRIM1, CTNNA1, DGCR5, FAM1194, FAFM134, FAM65A, IFNAR2, JSD1, KCN, LOC1012828, LRMP, MDR34, MTDH, NIPSNAP1, NRXN1, PLX1, PPP1R14, RADS1C, RBPMS2, RNF109, SEMP, SF3A1, SFRS14, SPATA13, SRD5A3, STARD3, TBX15, TCF15, TGFBI1, TNFRSF14, UTP1, ZBED2, ZNF69                                                                                                                                                         | 4q27      | rs2069763  | ACY1, ADCY7, AMFR, APBA3, ARHGAP4, BCL2L1, BET1, C14orf166, C11orf63, C11orf64, COPPS, CSRP2, CYP20A1, DT3X, ENPP4, FOXO4, GCA, GCE2, HERPUD1, IL13RB1, IL7, IRP7, KPN2, LOC10013023, LOC401014, LOC645387, LOC645388, LOC64698, LOC728139, LTB, LYPAL1, MCART1, MRPL4, MRPS22, MTR1, NKTR, NTSDC3, NUBB, OFD1, PANX1, PDKP1, PHIC1, PHIF19, PRKCE, PRRT3, PSDM6, RHOG, RNF121, TRKD, SAFB, SEC11C, SECC1B2L, SIX3, SNHG1, ST7, SUV39H1, TMM23, TMEM145, TPST1, ZNF189                                                               | 4q32.3    | rs2611215  | C17orf40, C12orf30, ML15, SXP1                                                                                                                                                                                                                                                                                                                                                                                                                                                                                                                                                                                                                                                                                                                                                                                                                                                                                                                                                                                                                                                                                                                                                                                                                                                                                                                                                                                                                                                                                                                                                                                                                                                                                                                                                                                                                                                                                                                                                                                                                                                                                                                                                                                                                                                                                                                                                                                                                                                                                                                                                                                                                                                                                                                                                                                                                                                                                                                                                                                                                                                                                                                                                                                                                                                                                                                                                                                                                                                                                                                                                                                                                                                                                                                                                                                                                                                                                                                                                                                                                                                                                                                                                                                                                                                                                                                                                                                                                                                                                                                                                                                                                                                                                                                                                                                                                                                                                                                                                                                                                                                                                                                   | 5p13.2 | rs6897932 | ARHGAP17, C1orf94, C1orf97, C2orf73, CHD1, CNR1, COMMD3, FAMIL1A, FLYWCH1, IL17R, LOC196752, LOC403287, LYPD8F, MTM1E, MYL10, PIM3, PMSB, PTPR, RGS20, SLEN1, WDR19 | 5p13.2 | rs11954020 | IL22RA2, LOC392787 | 10p15.1 | rs12251307 | ARL6P5, C11orf63, C11orf7, CTNNA1, EDEM1, FAM18B, FER1L3, FSCN1, GRIN1, LRIG1, LRPL5, MYO6, NR2F2, OTUD4, P4HAI1, RAB15, TRCE, TMSF2, TMEM154, TNK1, TRAK1 | 1q32.1 | rs2816316 | BRD4, C8orf73, CCL4L1, DHRS9, FGR, F7U4, G3BP1, GMEB2, KIAA0556, LINC, LOC10013474, PHW14, PLA, RAR1P2, SCAND1, SPTAN1, TATN2, TUBGCP2, WDR75, ZNF329 | 2q33.2 | rs3087243 | ARHGAP17, C1orf94, C1orf97, C2orf73, CHD1, CNR1, COMMD3, FAMIL1A, FLYWCH1, IL17R, LOC196752, LOC403287, LYPD8F, MTM1E, MYL10, PIM3, PMSB, PTPR, RGS20, SLEN1, WDR19 | 5p13.2 | rs11954020 | IL22RA2, LOC392787 | 10p15.1 | rs12251307 | ARL6P5, C11orf63, C11orf7, CTNNA1, EDEM1, FAM18B, FER1L3, FSCN1, GRIN1, LRIG1, LRPL5, MYO6, NR2F2, OTUD4, P4HAI1, RAB15, TRCE, TMSF2, TMEM154, TNK1, TRAK1 |
| 1q32.1    | rs3024493 | ABC64, ATG9A, DNMC3, LOC642361, LOC644725, LOC645262, MYO1C, TNSA2, ZNF37A, ZNF995, ZPBP2                                                                                                                                                                                                                                                                                                                                                                                                                                            | 2q33.2    | rs3087243  | ARHGAP17, C1orf94, C1orf97, C2orf73, CHD1, CNR1, COMMD3, FAMIL1A, FLYWCH1, IL17R, LOC196752, LOC403287, LYPD8F, MTM1E, MYL10, PIM3, PMSB, PTPR, RGS20, SLEN1, WDR19                                                                                                                                                                                                                                                                                                                                                                  | 5p13.2    | rs11954020 | IL22RA2, LOC392787                                                                                                                                                                                                                                                                                                                                                                                                                                                                                                                   | 10p15.1   | rs12251307 | ARL6P5, C11orf63, C11orf7, CTNNA1, EDEM1, FAM18B, FER1L3, FSCN1, GRIN1, LRIG1, LRPL5, MYO6, NR2F2, OTUD4, P4HAI1, RAB15, TRCE, TMSF2, TMEM154, TNK1, TRAK1                                                                                                                                                                                                                                                                                                                                                                                                                                                                                                                                                                                                                                                                                                                                                                                                                                                                                                                                                                                                                                                                                                                                                                                                                                                                                                                                                                                                                                                                                                                                                                                                                                                                                                                                                                                                                                                                                                                                                                                                                                                                                                                                                                                                                                                                                                                                                                                                                                                                                                                                                                                                                                                                                                                                                                                                                                                                                                                                                                                                                                                                                                                                                                                                                                                                                                                                                                                                                                                                                                                                                                                                                                                                                                                                                                                                                                                                                                                                                                                                                                                                                                                                                                                                                                                                                                                                                                                                                                                                                                                                                                                                                                                                                                                                                                                                                                                                                                                                                                                       |        |           |                                                                                                                                                                     |        |            |                    |         |            |                                                                                                                                                            |        |           |                                                                                                                                                       |        |           |                                                                                                                                                                     |        |            |                    |         |            |                                                                                                                                                            |
| 1q32.1    | rs6691977 | TRPC6                                                                                                                                                                                                                                                                                                                                                                                                                                                                                                                                | 2q33.2    | rs3087243  | ARHGAP17, C1orf94, C1orf97, C2orf73, CHD1, CNR1, COMMD3, FAMIL1A, FLYWCH1, IL17R, LOC196752, LOC403287, LYPD8F, MTM1E, MYL10, PIM3, PMSB, PTPR, RGS20, SLEN1, WDR19                                                                                                                                                                                                                                                                                                                                                                  | 5p13.2    | rs11954020 | IL22RA2, LOC392787                                                                                                                                                                                                                                                                                                                                                                                                                                                                                                                   | 10p15.1   | rs12251307 | ARL6P5, C11orf63, C11orf7, CTNNA1, EDEM1, FAM18B, FER1L3, FSCN1, GRIN1, LRIG1, LRPL5, MYO6, NR2F2, OTUD4, P4HAI1, RAB15, TRCE, TMSF2, TMEM154, TNK1, TRAK1                                                                                                                                                                                                                                                                                                                                                                                                                                                                                                                                                                                                                                                                                                                                                                                                                                                                                                                                                                                                                                                                                                                                                                                                                                                                                                                                                                                                                                                                                                                                                                                                                                                                                                                                                                                                                                                                                                                                                                                                                                                                                                                                                                                                                                                                                                                                                                                                                                                                                                                                                                                                                                                                                                                                                                                                                                                                                                                                                                                                                                                                                                                                                                                                                                                                                                                                                                                                                                                                                                                                                                                                                                                                                                                                                                                                                                                                                                                                                                                                                                                                                                                                                                                                                                                                                                                                                                                                                                                                                                                                                                                                                                                                                                                                                                                                                                                                                                                                                                                       |        |           |                                                                                                                                                                     |        |            |                    |         |            |                                                                                                                                                            |        |           |                                                                                                                                                       |        |           |                                                                                                                                                                     |        |            |                    |         |            |                                                                                                                                                            |
| 2p24.3    | rs1534422 | AFARP1, CCDC106, CD69, DDR2, DNHL1, FCRLB, FGFR1L, GPR81, HESX1, IL20RB, ITGB1BP1, LOC782725, OLFML2, SPAN1, SNTB2, STG6A2, TRC4A, ZNF462, ZNF963                                                                                                                                                                                                                                                                                                                                                                                    | 2q33.2    | rs2313727  | AES, AMOT, ANKRD50, C1orf94, CACNB3, CCN1L1, CLC1T, COPPS, DGCR5, DNAE2, LOC10012838, LOC10013083, LOC401252, LRAP, MIR491, NRXN2, OSGE, PKC3A, RAB13, RADS1C, RDH10, ZNF10, SENP6, SH3BP1, SLC35A1, SMCA, TRF10, TNFSF12, VRK1, WHSC1L1, ZM473, ZNF394                                                                                                                                                                                                                                                                              | 6p15      | rs597325   | ZNF187, ZNF266, ZNF394, ZNF493, ZNF69                                                                                                                                                                                                                                                                                                                                                                                                                                                                                                | 6p15      | rs597325   | ZNF187, ZNF266, ZNF394, ZNF493, ZNF69                                                                                                                                                                                                                                                                                                                                                                                                                                                                                                                                                                                                                                                                                                                                                                                                                                                                                                                                                                                                                                                                                                                                                                                                                                                                                                                                                                                                                                                                                                                                                                                                                                                                                                                                                                                                                                                                                                                                                                                                                                                                                                                                                                                                                                                                                                                                                                                                                                                                                                                                                                                                                                                                                                                                                                                                                                                                                                                                                                                                                                                                                                                                                                                                                                                                                                                                                                                                                                                                                                                                                                                                                                                                                                                                                                                                                                                                                                                                                                                                                                                                                                                                                                                                                                                                                                                                                                                                                                                                                                                                                                                                                                                                                                                                                                                                                                                                                                                                                                                                                                                                                                            |        |           |                                                                                                                                                                     |        |            |                    |         |            |                                                                                                                                                            |        |           |                                                                                                                                                       |        |           |                                                                                                                                                                     |        |            |                    |         |            |                                                                                                                                                            |
| 2p23.3    | rs2165738 | ALIS2, ATM, C17orf70, C1orf91, CTPS2, DDIT1, DHX36, GRAMD10, GRPR, LITAF, LOC10012958, LOC653620, LIPN, LSM6, METTL3, PHF5A, PRDM1, PVRIG, RBM33, RORA, SIRT1, SLC37A4, SNORD110, SOSTM1, TBC1D24, TCF19, TNFRSF211, VPS37B                                                                                                                                                                                                                                                                                                          | 2q35      | rs3731865  | ARHGDA4, ATP11F, C11orf97, C11orf62, C11orf21, C11orf91, C11orf37, CCDC424, CEND1, CENPM, ENO3, FAM101B, FEZ1, IGFBP, IL16, IL27RA, KIF12, LAGL3S3BP, LITAF, LOC824215, LOC730313, LHO12ICR1, LPHN3, LTB, LYPD6B, MAP3K, MKNK2, N6AMT1, NEK6, NTF5, OMI, PNLDC1, PANGA, PANK1, PMPR, PPR2R2B, PRDM1, SCNN1B, SERPINE1, SH3BP1, SHROOM4, SLC3074, SPIRE1, TCF2, TLE4, TMEM79, TNFRSF17B, TNFSF14, TNFSID1, WIP1                                                                                                                       | 6q15      | rs597325   | ZNF187, ZNF266, ZNF394, ZNF493, ZNF69                                                                                                                                                                                                                                                                                                                                                                                                                                                                                                | 6p15      | rs597325   | ZNF187, ZNF266, ZNF394, ZNF493, ZNF69                                                                                                                                                                                                                                                                                                                                                                                                                                                                                                                                                                                                                                                                                                                                                                                                                                                                                                                                                                                                                                                                                                                                                                                                                                                                                                                                                                                                                                                                                                                                                                                                                                                                                                                                                                                                                                                                                                                                                                                                                                                                                                                                                                                                                                                                                                                                                                                                                                                                                                                                                                                                                                                                                                                                                                                                                                                                                                                                                                                                                                                                                                                                                                                                                                                                                                                                                                                                                                                                                                                                                                                                                                                                                                                                                                                                                                                                                                                                                                                                                                                                                                                                                                                                                                                                                                                                                                                                                                                                                                                                                                                                                                                                                                                                                                                                                                                                                                                                                                                                                                                                                                            |        |           |                                                                                                                                                                     |        |            |                    |         |            |                                                                                                                                                            |        |           |                                                                                                                                                       |        |           |                                                                                                                                                                     |        |            |                    |         |            |                                                                                                                                                            |
| 2q11.2    | rs6534442 | ATM, DONSON, HDHD2, LOC283340, MGAT10, OSCAR, PHF16, RNF140, TMR2                                                                                                                                                                                                                                                                                                                                                                                                                                                                    | 6q15      | rs597325   | ZNF187, ZNF266, ZNF394, ZNF493, ZNF69                                                                                                                                                                                                                                                                                                                                                                                                                                                                                                | 6p15      | rs597325   | ZNF187, ZNF266, ZNF394, ZNF493, ZNF69                                                                                                                                                                                                                                                                                                                                                                                                                                                                                                | 6p15      | rs597325   | ZNF187, ZNF266, ZNF394, ZNF493, ZNF69                                                                                                                                                                                                                                                                                                                                                                                                                                                                                                                                                                                                                                                                                                                                                                                                                                                                                                                                                                                                                                                                                                                                                                                                                                                                                                                                                                                                                                                                                                                                                                                                                                                                                                                                                                                                                                                                                                                                                                                                                                                                                                                                                                                                                                                                                                                                                                                                                                                                                                                                                                                                                                                                                                                                                                                                                                                                                                                                                                                                                                                                                                                                                                                                                                                                                                                                                                                                                                                                                                                                                                                                                                                                                                                                                                                                                                                                                                                                                                                                                                                                                                                                                                                                                                                                                                                                                                                                                                                                                                                                                                                                                                                                                                                                                                                                                                                                                                                                                                                                                                                                                                            |        |           |                                                                                                                                                                     |        |            |                    |         |            |                                                                                                                                                            |        |           |                                                                                                                                                       |        |           |                                                                                                                                                                     |        |            |                    |         |            |                                                                                                                                                            |
| 2q12.1    | rs6543134 | ABC61, ACER2, ADD3, ADK, ANKRD2, ANKRD2, C1orf94, CD82, CECR3, DEDD, DENND3, DOK4, EBF1, EPCR1, IL12A, KIDNS20, KRIT1, LOC136143, LOC652968, LRIG2, MACP1, MALPBP1, MGAT4B, NBPFF10, NBPFF20, NBPFF, NQO2, PRKX, PHK3CD, PREB, PRCCBP0, TPST1IP, RMS1, ROBLD3, RRP1, SEM7A, SLC36A1, SULF2, TXNRD1, UNC5F32                                                                                                                                                                                                                          | 6p15.2    | rs10517086 | ABC61, ACER2, ADD3, ADK, ANKRD2, ANKRD2, C1orf94, CD82, CECR3, DEDD, DENND3, DOK4, EBF1, EPCR1, IL12A, KIDNS20, KRIT1, LOC136143, LOC652968, LRIG2, MACP1, MALPBP1, MGAT4B, NBPFF10, NBPFF20, NBPFF, NQO2, PRKX, PHK3CD, PREB, PRCCBP0, TPST1IP, RMS1, ROBLD3, RRP1, SEM7A, SLC36A1, SULF2, TXNRD1, UNC5F32                                                                                                                                                                                                                          | 6p15.2    | rs10517086 | ABC61, ACER2, ADD3, ADK, ANKRD2, ANKRD2, C1orf94, CD82, CECR3, DEDD, DENND3, DOK4, EBF1, EPCR1, IL12A, KIDNS20, KRIT1, LOC136143, LOC652968, LRIG2, MACP1, MALPBP1, MGAT4B, NBPFF10, NBPFF20, NBPFF, NQO2, PRKX, PHK3CD, PREB, PRCCBP0, TPST1IP, RMS1, ROBLD3, RRP1, SEM7A, SLC36A1, SULF2, TXNRD1, UNC5F32                                                                                                                                                                                                                          | 6p15.2    | rs10517086 | ABC61, ACER2, ADD3, ADK, ANKRD2, ANKRD2, C1orf94, CD82, CECR3, DEDD, DENND3, DOK4, EBF1, EPCR1, IL12A, KIDNS20, KRIT1, LOC136143, LOC652968, LRIG2, MACP1, MALPBP1, MGAT4B, NBPFF10, NBPFF20, NBPFF, NQO2, PRKX, PHK3CD, PREB, PRCCBP0, TPST1IP, RMS1, ROBLD3, RRP1, SEM7A, SLC36A1, SULF2, TXNRD1, UNC5F32                                                                                                                                                                                                                                                                                                                                                                                                                                                                                                                                                                                                                                                                                                                                                                                                                                                                                                                                                                                                                                                                                                                                                                                                                                                                                                                                                                                                                                                                                                                                                                                                                                                                                                                                                                                                                                                                                                                                                                                                                                                                                                                                                                                                                                                                                                                                                                                                                                                                                                                                                                                                                                                                                                                                                                                                                                                                                                                                                                                                                                                                                                                                                                                                                                                                                                                                                                                                                                                                                                                                                                                                                                                                                                                                                                                                                                                                                                                                                                                                                                                                                                                                                                                                                                                                                                                                                                                                                                                                                                                                                                                                                                                                                                                                                                                                                                      |        |           |                                                                                                                                                                     |        |            |                    |         |            |                                                                                                                                                            |        |           |                                                                                                                                                       |        |           |                                                                                                                                                                     |        |            |                    |         |            |                                                                                                                                                            |
| 2q24.2    | rs1990760 | ACSL1, ACTR3, ANP32, ANXA2P1, BTG3, C1orf23, CAST, CD164, CKS2, DCUN1D5, DEDD, DHX30, DOLK, EPB412, GDB3, FLYWCH2, GLRX5, IRF1, KIF3B, LCM1, LOC100130154, LOC100132499, LOC100134504, LOC413115, LOC392285, LOC423232, LOC645466, LOC645467, LOC645468, LOC645469, LOC728026, LOC728973, MAD2L1, NIPS, NUP90, OMA1, PSMB3, RPS28, STG7L, MIR41, MRPS22, MTRF1, NKTR, NUSAP1, OFD1, PANX1, PDKP1, PHC2, PHF19, PRKCE, PRRT3, PSDM6, HOBX, RNF121, RCTD1, SAFB, SEC11C, SECISBP1, SIK3, SOD3, SNHG1, ST7, SYF9H1, TPST1, WRBP, ZNF199 | 12p13.1   | rs3745171  | ACSL1, ACTR3, ANP32, ANXA2P1, BTG3, C1orf23, CAST, CD164, CKS2, DCUN1D5, DEDD, DHX30, DOLK, EPB412, GDB3, FLYWCH2, GLRX5, IRF1, KIF3B, LCM1, LOC100130154, LOC100132499, LOC100134504, LOC413115, LOC392285, LOC423232, LOC645466, LOC645467, LOC645468, LOC645469, LOC728026, LOC728973, MAD2L1, NIPS, NUP90, OMA1, PSMB3, RPS28, STG7L, MIR41, MRPS22, MTRF1, NKTR, NUSAP1, OFD1, PANX1, PDKP1, PHC2, PHF19, PRKCE, PRRT3, PSDM6, HOBX, RNF121, RCTD1, SAFB, SEC11C, SECISBP1, SIK3, SOD3, SNHG1, ST7, SYF9H1, TPST1, WRBP, ZNF199 | 12p13.1   | rs3745171  | ACSL1, ACTR3, ANP32, ANXA2P1, BTG3, C1orf23, CAST, CD164, CKS2, DCUN1D5, DEDD, DHX30, DOLK, EPB412, GDB3, FLYWCH2, GLRX5, IRF1, KIF3B, LCM1, LOC100130154, LOC100132499, LOC100134504, LOC413115, LOC392285, LOC423232, LOC645466, LOC645467, LOC645468, LOC645469, LOC728026, LOC728973, MAD2L1, NIPS, NUP90, OMA1, PSMB3, RPS28, STG7L, MIR41, MRPS22, MTRF1, NKTR, NUSAP1, OFD1, PANX1, PDKP1, PHC2, PHF19, PRKCE, PRRT3, PSDM6, HOBX, RNF121, RCTD1, SAFB, SEC11C, SECISBP1, SIK3, SOD3, SNHG1, ST7, SYF9H1, TPST1, WRBP, ZNF199 | 12p13.1   | rs3745171  | ACSL1, ACTR3, ANP32, ANXA2P1, BTG3, C1orf23, CAST, CD164, CKS2, DCUN1D5, DEDD, DHX30, DOLK, EPB412, GDB3, FLYWCH2, GLRX5, IRF1, KIF3B, LCM1, LOC100130154, LOC100132499, LOC100134504, LOC413115, LOC392285, LOC423232, LOC645466, LOC645467, LOC645468, LOC645469, LOC728026, LOC728973, MAD2L1, NIPS, NUP90, OMA1, PSMB3, RPS28, STG7L, MIR41, MRPS22, MTRF1, NKTR, NUSAP1, OFD1, PANX1, PDKP1, PHC2, PHF19, PRKCE, PRRT3, PSDM6, HOBX, RNF121, RCTD1, SAFB, SEC11C, SECISBP1, SIK3, SOD3, SNHG1, ST7, SYF9H1, TPST1, WRBP, ZNF199                                                                                                                                                                                                                                                                                                                                                                                                                                                                                                                                                                                                                                                                                                                                                                                                                                                                                                                                                                                                                                                                                                                                                                                                                                                                                                                                                                                                                                                                                                                                                                                                                                                                                                                                                                                                                                                                                                                                                                                                                                                                                                                                                                                                                                                                                                                                                                                                                                                                                                                                                                                                                                                                                                                                                                                                                                                                                                                                                                                                                                                                                                                                                                                                                                                                                                                                                                                                                                                                                                                                                                                                                                                                                                                                                                                                                                                                                                                                                                                                                                                                                                                                                                                                                                                                                                                                                                                                                                                                                                                                                                                                             |        |           |                                                                                                                                                                     |        |            |                    |         |            |                                                                                                                                                            |        |           |                                                                                                                                                       |        |           |                                                                                                                                                                     |        |            |                    |         |            |                                                                                                                                                            |
| 2q24.2    | rs1574517 | ACSL1, ACTR3, ANP32, ANXA2P1, BTG3, C1orf23, CAST, CD164, CKS2, DCUN1D5, DEDD, DHX30, DOLK, EPB412, GDB3, FLYWCH2, GLRX5, IRF1, KIF3B, LCM1, LOC100130154, LOC100132499, LOC100134504, LOC413115, LOC392285, LOC423232, LOC645466, LOC645467, LOC645468, LOC645469, LOC728026, LOC728973, MAD2L1, NIPS, NUP90, OMA1, PSMB3, RPS28, STG7L, MIR41, MRPS22, MTRF1, NKTR, NUSAP1, OFD1, PANX1, PDKP1, PHC2, PHF19, PRKCE, PRRT3, PSDM6, HOBX, RNF121, RCTD1, SAFB, SEC11C, SECISBP1, SIK3, SOD3, SNHG1, ST7, SYF9H1, TPST1, WRBP, ZNF199 | 4q27      | rs17388568 | ADD3, ALG3, APBA3, BCL2L7, C17orf61, C17orf96, C2orf79, C2orf40, CDC42BP4, CRIM1, CTR, EYXO3A, FAF5, PTF1, HLA-H, HNRNP4B, IRF7, KIF3C, LOC404341, LOC728888, LRIG1, LTR, MTRX1, PHC2, RNF121, SAR1B, SECISBP2L, SLAIN2, SNHG1, SNOR457, SNTL2, TAGLN, TRIP10, ZC3H8                                                                                                                                                                                                                                                                 | 4q27      | rs17388568 | ADD3, ALG3, APBA3, BCL2L7, C17orf61, C17orf96, C2orf79, C2orf40, CDC42BP4, CRIM1, CTR, EYXO3A, FAF5, PTF1, HLA-H, HNRNP4B, IRF7, KIF3C, LOC404341, LOC728888, LRIG1, LTR, MTRX1, PHC2, RNF121, SAR1B, SECISBP2L, SLAIN2, SNHG1, SNOR457, SNTL2, TAGLN, TRIP10, ZC3H8                                                                                                                                                                                                                                                                 | 4q27      | rs17388568 | ADD3, ALG3, APBA3, BCL2L7, C17orf61, C17orf96, C2orf79, C2orf40, CDC42BP4, CRIM1, CTR, EYXO3A, FAF5, PTF1, HLA-H, HNRNP4B, IRF7, KIF3C, LOC404341, LOC728888, LRIG1, LTR, MTRX1, PHC2, RNF121, SAR1B, SECISBP2L, SLAIN2, SNHG1, SNOR457, SNTL2, TAGLN, TRIP10, ZC3H8                                                                                                                                                                                                                                                                                                                                                                                                                                                                                                                                                                                                                                                                                                                                                                                                                                                                                                                                                                                                                                                                                                                                                                                                                                                                                                                                                                                                                                                                                                                                                                                                                                                                                                                                                                                                                                                                                                                                                                                                                                                                                                                                                                                                                                                                                                                                                                                                                                                                                                                                                                                                                                                                                                                                                                                                                                                                                                                                                                                                                                                                                                                                                                                                                                                                                                                                                                                                                                                                                                                                                                                                                                                                                                                                                                                                                                                                                                                                                                                                                                                                                                                                                                                                                                                                                                                                                                                                                                                                                                                                                                                                                                                                                                                                                                                                                                                                             |        |           |                                                                                                                                                                     |        |            |                    |         |            |                                                                                                                                                            |        |           |                                                                                                                                                       |        |           |                                                                                                                                                                     |        |            |                    |         |            |                                                                                                                                                            |
| 12q13.1   | rs705704  | PITPN1, SERGEF, SLC26A6, SLC35A1, SNORA24, TABP4, TRAF3IP2, ANP, ANAPC11, ATF3, BCL2L11, C1orf93, CSNK1G1, DERA, DPF2, DUSP12, FXR1, GDF1, HOXC4, IFT2, JI28, KR17, LOC169834, LOC646786, LOC727804, LOC92659, MIR1471, MOAP1, NRP2, OR2T5, RPS27, TBL1X, TNFRSF13C, TUBB8, ZC3H1AF, ZNF491                                                                                                                                                                                                                                          | 14q24.1   | rs1465788  | BEND4, C17orf93, CENPM, CENPL, LOC10012800, LOC100129585, LOC100132425, LOC442727, LOC645384, MIR518A, NAP1L1, PHC2, PION, PPM1, PPP2R3C, PRRS, RHD5, RFC4, RMI1, SEC11C, SHMT1, SIRVA, SMC2A3, CTRP, BHLHE40, BRN, ZWINT                                                                                                                                                                                                                                                                                                            | 16p11.2   | rs9924471  | AGK, C3ORF50, CER7, CDKN12, CRELD1, DEK, DUS3L, E5Y71, FAM95, FANCA, FNIP1, KIF13B, LOC10012800, LOC100129585, LOC100132425, LOC442727, LOC645384, MIR518A, NAP1L1, PHC2, PION, PPM1, PPP2R3C, PRRS, RHD5, RFC4, RMI1, SEC11C, SHMT1, SIRVA, SMC2A3, CTRP, BHLHE40, BRN, ZWINT                                                                                                                                                                                                                                                       | 20p13     | rs2841305  | ABC61, ACER2, ADD3, ADK, ANKRD2, ANKRD2, C1orf94, CD82, CECR3, DEDD, DENND3, DOK4, EBF1, EPCR1, IL12A, KIDNS20, KRIT1, LOC136143, LOC652968, LRIG2, MACP1, MALPBP1, MGAT4B, NBPFF10, NBPFF20, NBPFF, NQO2, PRKX, PHK3CD, PREB, PRCCBP0, TPST1IP, RMS1, ROBLD3, RRP1, SEM7A, SLC36A1, SULF2, TXNRD1, UNC5F32                                                                                                                                                                                                                                                                                                                                                                                                                                                                                                                                                                                                                                                                                                                                                                                                                                                                                                                                                                                                                                                                                                                                                                                                                                                                                                                                                                                                                                                                                                                                                                                                                                                                                                                                                                                                                                                                                                                                                                                                                                                                                                                                                                                                                                                                                                                                                                                                                                                                                                                                                                                                                                                                                                                                                                                                                                                                                                                                                                                                                                                                                                                                                                                                                                                                                                                                                                                                                                                                                                                                                                                                                                                                                                                                                                                                                                                                                                                                                                                                                                                                                                                                                                                                                                                                                                                                                                                                                                                                                                                                                                                                                                                                                                                                                                                                                                      |        |           |                                                                                                                                                                     |        |            |                    |         |            |                                                                                                                                                            |        |           |                                                                                                                                                       |        |           |                                                                                                                                                                     |        |            |                    |         |            |                                                                                                                                                            |
| 14q32.2   | rs4900384 | ADNP, ATF3, ATP11B, BCL2L11, C1orf93, C11orf90, C11orf93, C1orf25, C2orf23, C3orf35, CDKN2AP1, CPNE1, DNBND2, DKK1, DPF2, DUSP2, FAM60B, FLYWCH1, HNF1, HNF4A, HNF4B, HNF4C, HNF4D, IFT2, IFT2L, IPNB1, ILDR2, JAM2, LOC100133277, LOC644544, LOC728127, LOC92659, MEL, MIR1471, NRP2, OSL1, ORS2, ORSH2, ORB1, OXTR, PMS1, RTTN, SI00413, SLC22A18, SNTB1, SPOPL, STIM2, STOM, TNFRSF13C, WDR48                                                                                                                                     | 14q32.2   | rs56994090 | C11orf90, C1orf91, KALMA, CIAPIN1, CSNK1G1, C2orf76, DCTN1, IF170B, IPO8, JAN1, KIAA0513, LOC407863, LOC642830, LOC728853, OAS1, SP110, STRA13                                                                                                                                                                                                                                                                                                                                                                                       | 16p11.2   | rs9924471  | AGK, C3ORF50, CER7, CDKN12, CRELD1, DEK, DUS3L, E5Y71, FAM95, FANCA, FNIP1, KIF13B, LOC10012800, LOC100129585, LOC100132425, LOC442727, LOC645384, MIR518A, NAP1L1, PHC2, PION, PPM1, PPP2R3C, PRRS, RHD5, RFC4, RMI1, SEC11C, SHMT1, SIRVA, SMC2A3, CTRP, BHLHE40, BRN, ZWINT                                                                                                                                                                                                                                                       | 21q23.1   | rs11203203 | C11orf76, C11orf90, C11orf93, CDKN3, CHCHD10, CYP11B, DCXR, DNAJB1, FGF13, FOXA1, GOLGB1, KCCS8, LOC62399, LOC72854, LOC72859, LOC72861, LOC72862, LOC72863, LOC72864, LOC72865, LOC72866, LOC72867, LOC72868, LOC72869, LOC72870, LOC72871, LOC72872, LOC72873, LOC72874, LOC72875, LOC72876, LOC72877, LOC72878, LOC72879, LOC72880, LOC72881, LOC72882, LOC72883, LOC72884, LOC72885, LOC72886, LOC72887, LOC72888, LOC72889, LOC72890, LOC72891, LOC72892, LOC72893, LOC72894, LOC72895, LOC72896, LOC72897, LOC72898, LOC72899, LOC72900, LOC72901, LOC72902, LOC72903, LOC72904, LOC72905, LOC72906, LOC72907, LOC72908, LOC72909, LOC72910, LOC72911, LOC72912, LOC72913, LOC72914, LOC72915, LOC72916, LOC72917, LOC72918, LOC72919, LOC72920, LOC72921, LOC72922, LOC72923, LOC72924, LOC72925, LOC72926, LOC72927, LOC72928, LOC72929, LOC72930, LOC72931, LOC72932, LOC72933, LOC72934, LOC72935, LOC72936, LOC72937, LOC72938, LOC72939, LOC72940, LOC72941, LOC72942, LOC72943, LOC72944, LOC72945, LOC72946, LOC72947, LOC72948, LOC72949, LOC72950, LOC72951, LOC72952, LOC72953, LOC72954, LOC72955, LOC72956, LOC72957, LOC72958, LOC72959, LOC72960, LOC72961, LOC72962, LOC72963, LOC72964, LOC72965, LOC72966, LOC72967, LOC72968, LOC72969, LOC72970, LOC72971, LOC72972, LOC72973, LOC72974, LOC72975, LOC72976, LOC72977, LOC72978, LOC72979, LOC72980, LOC72981, LOC72982, LOC72983, LOC72984, LOC72985, LOC72986, LOC72987, LOC72988, LOC72989, LOC72990, LOC72991, LOC72992, LOC72993, LOC72994, LOC72995, LOC72996, LOC72997, LOC72998, LOC72999, LOC73000, LOC73001, LOC73002, LOC73003, LOC73004, LOC73005, LOC73006, LOC73007, LOC73008, LOC73009, LOC73010, LOC73011, LOC73012, LOC73013, LOC73014, LOC73015, LOC73016, LOC73017, LOC73018, LOC73019, LOC73020, LOC73021, LOC73022, LOC73023, LOC73024, LOC73025, LOC73026, LOC73027, LOC73028, LOC73029, LOC73030, LOC73031, LOC73032, LOC73033, LOC73034, LOC73035, LOC73036, LOC73037, LOC73038, LOC73039, LOC73040, LOC73041, LOC73042, LOC73043, LOC73044, LOC73045, LOC73046, LOC73047, LOC73048, LOC73049, LOC73050, LOC73051, LOC73052, LOC73053, LOC73054, LOC73055, LOC73056, LOC73057, LOC73058, LOC73059, LOC73060, LOC73061, LOC73062, LOC73063, LOC73064, LOC73065, LOC73066, LOC73067, LOC73068, LOC73069, LOC73070, LOC73071, LOC73072, LOC73073, LOC73074, LOC73075, LOC73076, LOC73077, LOC73078, LOC73079, LOC73080, LOC73081, LOC73082, LOC73083, LOC73084, LOC73085, LOC73086, LOC73087, LOC73088, LOC73089, LOC73090, LOC73091, LOC73092, LOC73093, LOC73094, LOC73095, LOC73096, LOC73097, LOC73098, LOC73099, LOC73100, LOC73101, LOC73102, LOC73103, LOC73104, LOC73105, LOC73106, LOC73107, LOC73108, LOC73109, LOC73110, LOC73111, LOC73112, LOC73113, LOC73114, LOC73115, LOC73116, LOC73117, LOC73118, LOC73119, LOC73120, LOC73121, LOC73122, LOC73123, LOC73124, LOC73125, LOC73126, LOC73127, LOC73128, LOC73129, LOC73130, LOC73131, LOC73132, LOC73133, LOC73134, LOC73135, LOC73136, LOC73137, LOC73138, LOC73139, LOC73140, LOC73141, LOC73142, LOC73143, LOC73144, LOC73145, LOC73146, LOC73147, LOC73148, LOC73149, LOC73150, LOC73151, LOC73152, LOC73153, LOC73154, LOC73155, LOC73156, LOC73157, LOC73158, LOC73159, LOC73160, LOC73161, LOC73162, LOC73163, LOC73164, LOC73165, LOC73166, LOC73167, LOC73168, LOC73169, LOC73170, LOC73171, LOC73172, LOC73173, LOC73174, LOC73175, LOC73176, LOC73177, LOC73178, LOC73179, LOC73180, LOC73181, LOC73182, LOC73183, LOC73184, LOC73185, LOC73186, LOC73187, LOC73188, LOC73189, LOC73190, LOC73191, LOC73192, LOC73193, LOC73194, LOC73195, LOC73196, LOC73197, LOC73198, LOC73199, LOC73200, LOC73201, LOC73202, LOC73203, LOC73204, LOC73205, LOC73206, LOC73207, LOC73208, LOC73209, LOC73210, LOC73211, LOC73212, LOC73213, LOC73214, LOC73215, LOC73216, LOC73217, LOC73218, LOC73219, LOC73220, LOC73221, LOC73222, LOC73223, LOC73224, LOC73225, LOC73226, LOC73227, LOC73228, LOC73229, LOC73230, LOC73231, LOC73232, LOC73233, LOC73234, LOC73235, LOC73236, LOC73237, LOC73238, LOC73239, LOC73240, LOC73241, LOC73242, LOC73243, LOC73244, LOC73245, LOC73246, LOC73247, LOC73248, LOC73249, LOC73250, LOC73251, LOC73252, LOC73253, LOC73254, LOC73255, LOC73256, LOC73257, LOC73258, LOC73259, LOC73260, LOC73261, LOC73262, LOC73263, LOC73264, LOC73265, LOC73266, LOC73267, LOC73268, LOC73269, LOC73270, LOC73271, LOC73272, LOC73273, LOC73274, LOC73275, LOC73276, LOC73277, LOC73278, LOC73279, LOC73280, LOC73281, LOC73282, LOC73283, LOC73284, LOC73285, LOC73286, LOC73287, LOC73288, LOC73289, LOC73290, LOC73291, LOC73292, LOC73293, LOC73294, LOC73295, LOC73296, LOC73297, LOC73298, LOC73299, LOC73300, LOC73301, LOC73302, LOC73303, LOC73304, LOC73305, LOC73306, LOC73307, LOC73308, LOC73309, LOC73310, LOC73311, LOC73312, LOC73313, LOC73314, LOC73315, LOC73316, LOC73317, LOC73318, LOC73319, LOC73320, LOC73321, LOC73322, LOC73323, LOC73324, LOC73325, LOC73326, LOC73327, LOC73328, LOC73329, LOC73330, LOC73331, LOC73332, LOC73333, LOC73334, LOC73335, LOC73336, LOC73337, LOC73338, LOC73339, LOC73340, LOC73341, LOC7334 |        |           |                                                                                                                                                                     |        |            |                    |         |            |                                                                                                                                                            |        |           |                                                                                                                                                       |        |           |                                                                                                                                                                     |        |            |                    |         |            |                                                                                                                                                            |
